# Supplementary material for: Adolescent well-being and learning in times of COVID-19—A multi-country study of basic psychological need satisfaction, learning behavior, and the mediating roles of positive emotion and intrinsic motivation
Source: PubMed Central journal article supplement (PMC8115832; doi:10.1371/journal.pone.0251352), 2021-05-12
Supplement: pone.0251352.s001.pdf [file pone.0251352.s001.pdf]

## S1: Appendix A

*Bivariate latent correlations per country. Each table section contains coefficients for two countries separated by the diagonal. Values in bold letters represent significant correlations at  $p < .05$ .*

|                                  | Austria, Cyprus |             |             |             |             |             |             |             |             |
|----------------------------------|-----------------|-------------|-------------|-------------|-------------|-------------|-------------|-------------|-------------|
|                                  | 1               | 2           | 3           | 4           | 5           | 6           | 7           | 8           | 9           |
| 1. Competence                    | -               | <b>.54</b>  | <b>.49</b>  | <b>.39</b>  | <b>.55</b>  | <b>.73</b>  | .22         | <b>-.46</b> | <b>-.23</b> |
| 2. Autonomy                      | <b>.55</b>      | -           | <b>.33</b>  | <b>.35</b>  | <b>.43</b>  | <b>.43</b>  | <b>.34</b>  | -.19        | -.02        |
| 3. Relatedness                   | <b>.44</b>      | <b>.28</b>  | -           | <b>.33</b>  | <b>.34</b>  | <b>.42</b>  | .12         | <b>-.38</b> | <b>-.23</b> |
| 4. Positive emotion              | <b>.69</b>      | <b>.46</b>  | <b>.49</b>  | -           | .17         | .14         | .07         | -.03        | -.06        |
| 5. Intrinsic learning motivation | <b>.66</b>      | <b>.46</b>  | <b>.26</b>  | <b>.57</b>  | -           | <b>.68</b>  | <b>.29</b>  | <b>-.30</b> | <b>-.19</b> |
| 6. Engagement                    | <b>.48</b>      | <b>.32</b>  | <b>.21</b>  | <b>.32</b>  | <b>.56</b>  | -           | .23         | .14         | -.02        |
| 7. Persistence                   | <b>.63</b>      | <b>.35</b>  | <b>.35</b>  | <b>.41</b>  | <b>.56</b>  | <b>.67</b>  | -           | <b>-.54</b> | -.18        |
| 8. Procrastination               | <b>-.54</b>     | <b>-.27</b> | <b>-.25</b> | <b>-.34</b> | <b>-.43</b> | <b>-.38</b> | <b>-.71</b> | -           | .16         |
| 9. Age                           | <b>-.14</b>     | <b>-.06</b> | <b>-.20</b> | <b>-.19</b> | <b>-.10</b> | <b>.02</b>  | <b>-.16</b> | <b>.11</b>  | -           |

*Note.* Correlations for Austria ( $N = 19,337$ ) are below the diagonal and correlations for Cyprus ( $N = 141$ ) are above the diagonal.

|                                  | Finland, Germany |             |             |             |             |             |             |             |             |
|----------------------------------|------------------|-------------|-------------|-------------|-------------|-------------|-------------|-------------|-------------|
|                                  | 1                | 2           | 3           | 4           | 5           | 6           | 7           | 8           | 9           |
| 1. Competence                    | -                | <b>.46</b>  | <b>.38</b>  | <b>.63</b>  | <b>.66</b>  | <b>.55</b>  | <b>.68</b>  | <b>-.56</b> | <b>-.12</b> |
| 2. Autonomy                      | <b>.50</b>       | -           | <b>.20</b>  | <b>.37</b>  | <b>.40</b>  | <b>.23</b>  | <b>.35</b>  | <b>-.32</b> | -.04        |
| 3. Relatedness                   | <b>.47</b>       | <b>.27</b>  | -           | <b>.39</b>  | <b>.13</b>  | <b>.18</b>  | <b>.25</b>  | <b>-.18</b> | -.07        |
| 4. Positive emotion              | <b>.78</b>       | <b>.49</b>  | <b>.57</b>  | -           | <b>.49</b>  | <b>.26</b>  | <b>.34</b>  | <b>-.35</b> | <b>-.18</b> |
| 5. Intrinsic learning motivation | <b>.71</b>       | <b>.48</b>  | <b>.29</b>  | <b>.61</b>  | -           | <b>.60</b>  | <b>.55</b>  | <b>-.46</b> | -.05        |
| 6. Engagement                    | <b>.49</b>       | <b>.35</b>  | <b>.25</b>  | <b>.40</b>  | <b>.56</b>  | -           | <b>.68</b>  | <b>-.35</b> | -.03        |
| 7. Persistence                   | <b>.79</b>       | <b>.30</b>  | <b>.36</b>  | <b>.57</b>  | <b>.66</b>  | <b>.63</b>  | -           | <b>-.75</b> | <b>-.13</b> |
| 8. Procrastination               | <b>-.71</b>      | <b>-.29</b> | <b>-.23</b> | <b>-.49</b> | <b>-.56</b> | <b>-.37</b> | <b>-.79</b> | -           | <b>.23</b>  |
| 9. Age                           | -.03             | -.01        | -.03        | -.06        | -.02        | -.04        | .00         | -.01        | -           |

*Note.* Correlations for Finland ( $N = 614$ ) are below the diagonal and correlations for Germany ( $N = 629$ ) are above the diagonal.

| India, North Macedonia           |             |            |             |            |             |             |             |             |             |
|----------------------------------|-------------|------------|-------------|------------|-------------|-------------|-------------|-------------|-------------|
|                                  | 1           | 2          | 3           | 4          | 5           | 6           | 7           | 8           | 9           |
| 1. Competence                    | -           | <b>.67</b> | <b>.42</b>  | <b>.52</b> | <b>.71</b>  | <b>.26</b>  | <b>.65</b>  | <b>-.39</b> | -.05        |
| 2. Autonomy                      | <b>.71</b>  | -          | <b>.29</b>  | <b>.48</b> | <b>.53</b>  | <b>.21</b>  | <b>.42</b>  | <b>-.19</b> | .00         |
| 3. Relatedness                   | <b>.47</b>  | <b>.49</b> | -           | <b>.38</b> | <b>.24</b>  | <b>.09</b>  | <b>.36</b>  | <b>-.23</b> | <b>-.08</b> |
| 4. Positive emotion              | <b>.56</b>  | <b>.50</b> | <b>.48</b>  | -          | <b>.50</b>  | <b>.10</b>  | <b>.31</b>  | <b>-.17</b> | -.03        |
| 5. Intrinsic learning motivation | <b>.78</b>  | <b>.64</b> | <b>.40</b>  | <b>.60</b> | -           | <b>.33</b>  | <b>.61</b>  | <b>-.29</b> | -.06        |
| 6. Engagement                    | <b>.60</b>  | <b>.50</b> | <b>.31</b>  | <b>.36</b> | <b>.59</b>  | -           | <b>.54</b>  | <b>-.10</b> | <b>-.12</b> |
| 7. Persistence                   | <b>.74</b>  | <b>.62</b> | <b>.42</b>  | <b>.44</b> | <b>.66</b>  | <b>0.78</b> | -           | <b>-.57</b> | <b>-.10</b> |
| 8. Procrastination               | .04         | <b>.09</b> | -.01        | .05        | <b>.09</b>  | <b>0.23</b> | .05         | -           | <b>.12</b>  |
| 9. Age                           | <b>-.09</b> | -.03       | <b>-.10</b> | -.04       | <b>-.11</b> | <b>-.09</b> | <b>-.09</b> | <b>.09</b>  | -           |

*Note.* Correlations for India ( $N = 2,618$ ) are below the diagonal and correlations for North Macedonia ( $N = 1,084$ ) are above the diagonal.

| Poland, USA                      |             |             |             |             |             |             |             |             |            |
|----------------------------------|-------------|-------------|-------------|-------------|-------------|-------------|-------------|-------------|------------|
|                                  | 1           | 2           | 3           | 4           | 5           | 6           | 7           | 8           | 9          |
| 1. Competence                    | -           | <b>.43</b>  | <b>.52</b>  | <b>.43</b>  | <b>.48</b>  | .05         | -.05        | -.04        | <b>.14</b> |
| 2. Autonomy                      | <b>.51</b>  | -           | <b>.30</b>  | <b>.26</b>  | <b>.20</b>  | .08         | .07         | .05         | -.03       |
| 3. Relatedness                   | <b>.43</b>  | <b>.34</b>  | -           | <b>.54</b>  | <b>.31</b>  | <b>.11</b>  | .07         | -.03        | -.09       |
| 4. Positive emotion              | <b>.56</b>  | <b>.28</b>  | <b>.46</b>  | -           | <b>.28</b>  | .07         | <b>.12</b>  | -.05        | -.01       |
| 5. Intrinsic learning motivation | <b>.53</b>  | <b>.51</b>  | <b>.38</b>  | <b>.38</b>  | -           | -.05        | -.02        | -.03        | <b>.30</b> |
| 6. Engagement                    | .11         | .10         | .08         | .04         | <b>.45</b>  | -           | <b>.31</b>  | <b>-.20</b> | -.01       |
| 7. Persistence                   | <b>.48</b>  | <b>.30</b>  | <b>.35</b>  | <b>.19</b>  | <b>.54</b>  | <b>.51</b>  | -           | <b>.14</b>  | -.04       |
| 8. Procrastination               | <b>-.49</b> | <b>-.33</b> | <b>-.31</b> | <b>-.22</b> | <b>-.48</b> | <b>-.19</b> | <b>-.73</b> | -           | -.02       |
| 9. Age                           | <b>-.25</b> | <b>-.19</b> | <b>-.23</b> | <b>-.21</b> | <b>-.18</b> | .01         | <b>-.23</b> | <b>.25</b>  | -          |

*Note.* Correlations for Poland ( $N = 379$ ) are below the diagonal and correlations for the USA ( $N = 503$ ) are above the diagonal.
