# Supplementary material for: Adolescent well-being and learning in times of COVID-19—A multi-country study of basic psychological need satisfaction, learning behavior, and the mediating roles of positive emotion and intrinsic motivation
Source: PubMed Central journal article supplement (PMC8115832; doi:10.1371/journal.pone.0251352), 2021-05-12
Supplement: pone.0251352.s002.pdf [file pone.0251352.s002.pdf]

## S2: Appendix B

*Descriptive statistics for each country of data collection*

---

| Austria         |       |       |       |       |       |       |       |       |
|-----------------|-------|-------|-------|-------|-------|-------|-------|-------|
|                 | 1     | 2     | 3     | 4     | 5     | 6     | 7     | 8     |
| Number of Items | 3     | 3     | 3     | 3     | 3     | 3     | 3     | 3     |
| <i>M</i>        | 3.78  | 4.04  | 4.54  | 3.97  | 2.84  | 3.25  | 3.88  | 2.40  |
| <i>SD</i>       | 0.92  | 0.97  | 0.75  | 0.94  | 1.15  | 0.93  | 0.82  | 1.11  |
| Skewness        | -0.75 | -1.19 | -2.12 | -0.99 | 0.06  | -0.23 | -0.75 | 0.6   |
| Kurtosis        | 0.19  | 0.74  | 4.25  | 0.37  | -0.97 | -0.59 | 0.03  | -0.75 |
| Range           | 4.00  | 4.00  | 4.00  | 4.00  | 4.00  | 4.00  | 4.00  | 4.00  |

---

*Note.*  $N = 19,337$ . 1. Competence, 2. Autonomy, 3. Relatedness, 4. Positive emotion, 5. Intrinsic learning motivation, 6. Engagement, 7. Persistence, 8. Procrastination.

All scales used a 5-point response format.

---

| Cyprus          |       |       |       |       |       |       |       |       |
|-----------------|-------|-------|-------|-------|-------|-------|-------|-------|
|                 | 1     | 2     | 3     | 4     | 5     | 6     | 7     | 8     |
| Number of Items | 3     | 3     | 3     | 3     | 3     | 3     | 3     | 3     |
| <i>M</i>        | 3.68  | 3.75  | 4.30  | 3.61  | 2.68  | 3.23  | 3.43  | 2.73  |
| <i>SD</i>       | 0.98  | 0.83  | 0.73  | 0.96  | 1.04  | 0.98  | 0.88  | 0.90  |
| Skewness        | -0.57 | -0.65 | -1.26 | -0.59 | 0.21  | -0.41 | -0.04 | 0.23  |
| Kurtosis        | -0.45 | 0.03  | 1.6   | -0.32 | -0.63 | -0.32 | -0.82 | -0.93 |
| Range           | 4.00  | 4.00  | 4.00  | 4.00  | 4.00  | 4.00  | 4.00  | 4.00  |

---

*Note.*  $N = 141$ . 1. Competence, 2. Autonomy, 3. Relatedness, 4. Positive emotion, 5. Intrinsic learning motivation, 6. Engagement, 7. Persistence, 8. Procrastination.

All scales used a 5-point response format.

---

| Finland         |       |       |       |       |       |       |        |       |
|-----------------|-------|-------|-------|-------|-------|-------|--------|-------|
|                 | 1     | 2     | 3     | 4     | 5     | 6     | 7      | 8     |
| Number of Items | 3     | 3     | 3     | 3     | 3     | 3     | 3      | 3     |
| <i>M</i>        | 3.34  | 3.03  | 4.03  | 3.43  | 2.70  | 3.01  | 3.27   | 3.20  |
| <i>SD</i>       | 1.01  | 0.97  | 0.79  | 0.85  | 0.92  | 0.82  | 0.86   | 1.12  |
| Skewness        | -0.51 | -0.13 | -1.12 | -0.29 | 0.05  | 0.00  | -0.314 | -0.12 |
| Kurtosis        | -0.59 | -0.67 | 1.52  | -0.35 | -0.63 | -0.26 | -0.39  | -0.97 |
| Range           | 4.00  | 4.00  | 4.00  | 4.00  | 4.00  | 4.00  | 4.00   | 4.00  |

*Note.*  $N = 614$ . 1. Competence, 2. Autonomy, 3. Relatedness, 4. Positive emotion, 5. Intrinsic learning motivation, 6. Engagement, 7. Persistence, 8. Procrastination.

All scales used a 5-point response format.

| Germany         |       |       |       |       |       |       |       |       |
|-----------------|-------|-------|-------|-------|-------|-------|-------|-------|
|                 | 1     | 2     | 3     | 4     | 5     | 6     | 7     | 8     |
| Number of Items | 3     | 3     | 3     | 3     | 3     | 3     | 3     | 3     |
| <i>M</i>        | 3.43  | 3.74  | 4.39  | 3.66  | 2.45  | 2.98  | 3.58  | 2.83  |
| <i>SD</i>       | 0.94  | 1.01  | 0.80  | 0.95  | 1.03  | 0.94  | 0.85  | 1.15  |
| Skewness        | -0.40 | -0.77 | -1.63 | -0.60 | 0.40  | 0.11  | -0.40 | 0.19  |
| Kurtosis        | -0.33 | -0.16 | 2.3   | -0.36 | -0.65 | -0.53 | -0.45 | -1.10 |
| Range           | 4.00  | 4.00  | 4.00  | 4.00  | 4.00  | 4.00  | 4.00  | 4.00  |

*Note.*  $N = 629$ . 1. Competence, 2. Autonomy, 3. Relatedness, 4. Positive emotion, 5. Intrinsic learning motivation, 6. Engagement, 7. Persistence, 8. Procrastination.

All scales used a 5-point response format.

| India           |       |       |       |       |       |       |       |       |
|-----------------|-------|-------|-------|-------|-------|-------|-------|-------|
|                 | 1     | 2     | 3     | 4     | 5     | 6     | 7     | 8     |
| Number of Items | 3     | 3     | 3     | 3     | 3     | 3     | 3     | 3     |
| <i>M</i>        | 3.63  | 3.86  | 4.08  | 3.73  | 3.35  | 3.56  | 3.76  | 3.46  |
| <i>SD</i>       | 0.90  | 0.79  | 0.77  | 0.74  | 1.01  | 0.74  | 0.80  | 0.75  |
| Skewness        | -0.69 | -0.95 | -1.12 | -0.68 | -0.43 | -0.49 | -0.69 | -0.41 |
| Kurtosis        | 0.04  | 1.07  | 1.33  | 0.30  | -0.57 | -0.15 | 0.36  | -0.37 |
| Range           | 4.00  | 4.00  | 4.00  | 4.00  | 4.00  | 4.00  | 4.00  | 4.00  |

*Note.*  $N = 2,618$ . 1. Competence, 2. Autonomy, 3. Relatedness, 4. Positive emotion, 5. Intrinsic learning motivation, 6. Engagement, 7. Persistence, 8. Procrastination.

All scales used a 5-point response format.

| North Macedonia |       |       |       |       |       |       |       |       |
|-----------------|-------|-------|-------|-------|-------|-------|-------|-------|
|                 | 1     | 2     | 3     | 4     | 5     | 6     | 7     | 8     |
| Number of Items | 3     | 3     | 3     | 3     | 3     | 3     | 3     | 3     |
| <i>M</i>        | 3.72  | 3.73  | 4.41  | 3.86  | 3.06  | 3.32  | 3.84  | 2.61  |
| <i>SD</i>       | 0.89  | 0.91  | 0.79  | 0.87  | 1.10  | 0.88  | 0.81  | 1.04  |
| Skewness        | -0.73 | -0.78 | -1.83 | -0.87 | -0.06 | -0.19 | -0.71 | 0.45  |
| Kurtosis        | 0.18  | 0.21  | 3.66  | 0.51  | -0.84 | -0.64 | 0.32  | -0.77 |
| Range           | 4.00  | 4.00  | 4.00  | 4.00  | 4.00  | 4.00  | 4.00  | 4.00  |

*Note.*  $N = 1,084$ . 1. Competence, 2. Autonomy, 3. Relatedness, 4. Positive emotion, 5. Intrinsic learning motivation, 6. Engagement, 7. Persistence, 8. Procrastination.

All scales used a 5-point response format.

| Poland          |       |       |       |       |       |       |       |       |
|-----------------|-------|-------|-------|-------|-------|-------|-------|-------|
|                 | 1     | 2     | 3     | 4     | 5     | 6     | 7     | 8     |
| Number of Items | 2*    | 3     | 3     | 3     | 3     | 3     | 3     | 3     |
| <i>M</i>        | 3.56  | 3.20  | 4.12  | 3.52  | 2.47  | 3.13  | 3.43  | 3.02  |
| <i>SD</i>       | 1.03  | 1.05  | 0.92  | 0.94  | 1.02  | 0.89  | 0.81  | 1.02  |
| Skewness        | -0.50 | -0.20 | -1.28 | -0.51 | 0.41  | -0.05 | -0.31 | 0.13  |
| Kurtosis        | -0.22 | -0.82 | 1.29  | -0.36 | -0.52 | -0.42 | -0.27 | -0.93 |
| Range           | 4.00  | 4.00  | 4.00  | 4.00  | 4.00  | 4.00  | 4.00  | 4.00  |

*Note.*  $N = 379$ . 1. Competence, 2. Autonomy, 3. Relatedness, 4. Positive emotion, 5. Intrinsic learning motivation, 6. Engagement, 7. Persistence, 8. Procrastination.

All scales used a 5-point response format.

\* Due to technical issues, participants in Poland were only presented two items of the competence scale.

| USA             |       |       |       |       |       |       |       |       |
|-----------------|-------|-------|-------|-------|-------|-------|-------|-------|
|                 | 1     | 2     | 3     | 4     | 5     | 6     | 7     | 8     |
| Number of Items | 3     | 3     | 3     | 3     | 3     | 3     | 3     | 3     |
| <i>M</i>        | 3.53  | 3.63  | 3.62  | 3.24  | 3.76  | 3.32  | 3.25  | 3.13  |
| <i>SD</i>       | 1.40  | 1.09  | 1.29  | 1.31  | 1.25  | 1.15  | 0.98  | 1.02  |
| Skewness        | -0.53 | -0.64 | -0.59 | -0.15 | -0.73 | -0.40 | -0.10 | 0.05  |
| Kurtosis        | -1.38 | -0.50 | -1.28 | -1.48 | -0.89 | -0.90 | -0.71 | -0.87 |
| Range           | 4.00  | 4.00  | 4.00  | 4.00  | 4.00  | 4.00  | 4.00  | 4.00  |

*Note.*  $N = 503$ . 1. Competence, 2. Autonomy, 3. Relatedness, 4. Positive emotion, 5. Intrinsic learning motivation, 6. Engagement, 7. Persistence, 8. Procrastination.

All scales used a 5-point response format.
