# Supplementary material for: Adolescent well-being and learning in times of COVID-19—A multi-country study of basic psychological need satisfaction, learning behavior, and the mediating roles of positive emotion and intrinsic motivation
Source: PubMed Central journal article supplement (PMC8115832; doi:10.1371/journal.pone.0251352), 2021-05-12
Supplement: pone.0251352.s003.pdf [file pone.0251352.s003.pdf]

### S3: Appendix C

95% Bias-corrected bootstrap confidence intervals for direct and indirect effects of the multi-group mediation model for each country of data collection

|                                       | Austria    |            | Cyprus     |            | Finland    |            | Germany    |            | India      |            | North Macedonia |            | Poland*    |            | USA        |            |
|---------------------------------------|------------|------------|------------|------------|------------|------------|------------|------------|------------|------------|-----------------|------------|------------|------------|------------|------------|
|                                       | Lower 2.5% | Upper 2.5% | Lower 2.5% | Upper 2.5% | Lower 2.5% | Upper 2.5% | Lower 2.5% | Upper 2.5% | Lower 2.5% | Upper 2.5% | Lower 2.5%      | Upper 2.5% | Lower 2.5% | Upper 2.5% | Lower 2.5% | Upper 2.5% |
| <b>Direct Effects</b>                 |            |            |            |            |            |            |            |            |            |            |                 |            |            |            |            |            |
| Positive Emotion → Engagement         | -0.10      | -0.07      | -0.19      | 0.12       | -0.22      | 0.05       | -0.22      | -0.06      | -0.10      | 0.03       | -0.10           | 0.04       | -0.16      | 0.03       | -0.06      | 0.11       |
| Positive Emotion → Persistence        | -0.12      | -0.09      | -0.24      | 0.02       | -0.28      | 0.04       | -0.23      | -0.06      | -0.12      | 0.03       | -0.15           | -0.01      | -0.21      | -0.04      | -0.01      | 0.20       |
| Positive Emotion → Procrastination    | 0.09       | 0.15       | -0.15      | 0.24       | -0.06      | 0.36       | -0.07      | 0.23       | -0.04      | 0.15       | -0.04           | 0.18       | 0.02       | 0.29       | -0.16      | 0.09       |
| Learning Motivation → Engagement      | 0.24       | 0.26       | -0.09      | 0.30       | 0.19       | 0.36       | 0.20       | 0.37       | 0.08       | 0.18       | 0.07            | 0.21       | 0.22       | 0.50       | -0.16      | 0.01       |
| Learning Motivation → Persistence     | 0.16       | 0.19       | 0.08       | 0.42       | 0.07       | 0.29       | 0.05       | 0.25       | 0.06       | 0.18       | 0.12            | 0.26       | 0.17       | 0.39       | -0.11      | 0.10       |
| Learning Motivation → Procrastination | -0.19      | -0.14      | -0.20      | 0.25       | -0.31      | 0.01       | -0.36      | -0.05      | 0.01       | 0.16       | -0.17           | 0.06       | -0.55      | -0.17      | -0.10      | 0.15       |
| Competence → Engagement               | 0.16       | 0.20       | -0.23      | 0.33       | -0.01      | 0.25       | 0.16       | 0.38       | 0.11       | 0.27       | -0.07           | 0.17       | -0.19      | 0.07       | -0.09      | 0.11       |
| Competence → Persistence              | 0.37       | 0.42       | 0.18       | 0.73       | 0.44       | 0.75       | 0.35       | 0.64       | 0.32       | 0.51       | 0.23            | 0.48       | 0.09       | 0.39       | -0.25      | -0.02      |
| Competence → Procrastination          | -0.72      | -0.64      | -0.68      | -0.08      | -1.18      | -0.74      | -0.81      | -0.37      | -0.19      | 0.02       | -0.72           | -0.33      | -0.64      | -0.24      | -0.20      | 0.09       |
| Competence → Positive Emotion         | 0.59       | 0.64       | -0.13      | 0.57       | 0.45       | 0.63       | 0.47       | 0.73       | 0.23       | 0.38       | 0.19            | 0.46       | 0.36       | 0.73       | 0.07       | 0.36       |
| Competence → Learning Motivation      | 0.79       | 0.84       | 0.20       | 0.81       | 0.55       | 0.74       | 0.68       | 0.92       | 0.73       | 0.94       | 0.74            | 1.04       | 0.19       | 0.47       | 0.21       | 0.47       |
| Autonomy → Engagement                 | 0.00       | 0.03       | -0.02      | 0.51       | -0.03      | 0.12       | -0.12      | 0.03       | 0.01       | 0.15       | -0.06           | 0.11       | -0.20      | 0.00       | -0.06      | 0.14       |
| Autonomy → Persistence                | -0.04      | 0.00       | -0.25      | 0.25       | -0.22      | -0.04      | -0.05      | 0.12       | 0.05       | 0.22       | -0.10           | 0.09       | -0.19      | 0.05       | -0.02      | 0.22       |
| Autonomy → Procrastination            | 0.03       | 0.09       | -0.17      | 0.51       | 0.00       | 0.26       | -0.23      | 0.04       | 0.03       | 0.23       | 0.02            | 0.30       | -0.16      | 0.21       | -0.05      | 0.24       |
| Autonomy → Positive Emotion           | 0.10       | 0.14       | -0.08      | 0.71       | 0.03       | 0.20       | -0.01      | 0.22       | 0.01       | 0.20       | 0.14            | 0.38       | -0.22      | 0.11       | -0.06      | 0.27       |
| Autonomy → Learning Motivation        | 0.17       | 0.22       | -0.11      | 0.59       | 0.10       | 0.29       | 0.02       | 0.24       | 0.04       | 0.26       | 0.01            | 0.28       | 0.18       | 0.48       | -0.14      | 0.13       |
| Relatedness → Engagement              | 0.03       | 0.06       | -0.25      | 0.26       | -0.04      | 0.14       | -0.01      | 0.14       | -0.03      | 0.06       | -0.06           | 0.06       | -0.11      | 0.08       | -0.04      | 0.17       |
| Relatedness → Persistence             | 0.09       | 0.13       | -0.17      | 0.30       | -0.07      | 0.14       | -0.05      | 0.16       | 0.00       | 0.10       | 0.07            | 0.21       | 0.00       | 0.22       | 0.07       | 0.18       |
| Relatedness → Procrastination         | -0.10      | -0.04      | -0.54      | 0.10       | 0.00       | 0.27       | -0.14      | 0.17       | -0.13      | 0.01       | -0.22           | -0.01      | -0.26      | 0.05       | -0.16      | 0.13       |
| Relatedness → Positive Emotion        | 0.26       | 0.31       | -0.16      | 0.59       | 0.17       | 0.36       | 0.10       | 0.32       | 0.18       | 0.30       | 0.15            | 0.34       | 0.15       | 0.46       | 0.31       | 0.62       |
| Relatedness → Learning Motivation     | -0.09      | -0.05      | -0.18      | 0.37       | -0.20      | 0.02       | -0.30      | -0.09      | -0.07      | 0.06       | -0.18           | -0.01      | 0.01       | 0.25       | 0.01       | 0.25       |

**Indirect Effects**

## Competence → Positive Emotion

|                 |       |       |       |      |       |      |       |       |       |      |       |      |       |       |       |      |
|-----------------|-------|-------|-------|------|-------|------|-------|-------|-------|------|-------|------|-------|-------|-------|------|
| Engagement      | -0.06 | -0.04 | -0.06 | 0.02 | -0.12 | 0.02 | -0.14 | -0.04 | -0.03 | 0.01 | -0.04 | 0.01 | -0.09 | 0.01  | -0.01 | 0.03 |
| Persistence     | -0.08 | -0.05 | -0.12 | 0.01 | -0.16 | 0.02 | -0.15 | -0.04 | -0.04 | 0.01 | -0.06 | 0.00 | -0.13 | -0.02 | 0.00  | 0.06 |
| Procrastination | 0.06  | 0.09  | -0.03 | 0.12 | -0.03 | 0.21 | -0.04 | 0.14  | -0.01 | 0.05 | -0.01 | 0.07 | 0.01  | 0.18  | -0.04 | 0.02 |

## Competence → Learning Motivation

|                 |       |       |       |      |       |      |       |       |      |      |       |      |       |       |       |      |
|-----------------|-------|-------|-------|------|-------|------|-------|-------|------|------|-------|------|-------|-------|-------|------|
| Engagement      | 0.19  | 0.22  | -0.03 | 0.20 | 0.12  | 0.25 | 0.16  | 0.31  | 0.06 | 0.16 | 0.07  | 0.19 | 0.06  | 0.20  | -0.06 | 0.00 |
| Persistence     | 0.13  | 0.15  | 0.03  | 0.28 | 0.05  | 0.19 | 0.04  | 0.20  | 0.05 | 0.15 | 0.11  | 0.24 | 0.05  | 0.15  | -0.04 | 0.03 |
| Procrastination | -0.15 | -0.12 | -0.09 | 0.14 | -0.20 | 0.01 | -0.28 | -0.04 | 0.01 | 0.14 | -0.15 | 0.05 | -0.21 | -0.05 | -0.04 | 0.05 |

## Autonomy → Positive Emotion

|                 |       |       |       |      |       |      |       |      |       |      |       |      |       |      |       |      |
|-----------------|-------|-------|-------|------|-------|------|-------|------|-------|------|-------|------|-------|------|-------|------|
| Engagement      | -0.01 | -0.01 | -0.12 | 0.02 | -0.04 | 0.00 | -0.04 | 0.00 | -0.02 | 0.00 | -0.03 | 0.01 | 0.00  | 0.03 | -0.01 | 0.02 |
| Persistence     | -0.02 | -0.01 | -0.13 | 0.01 | -0.05 | 0.00 | -0.04 | 0.00 | -0.02 | 0.00 | -0.05 | 0.00 | -0.01 | 0.04 | 0.00  | 0.04 |
| Procrastination | 0.01  | 0.02  | -0.03 | 0.15 | 0.00  | 0.06 | -0.01 | 0.04 | 0.00  | 0.02 | -0.01 | 0.05 | -0.05 | 0.01 | -0.04 | 0.01 |

## Autonomy → Learning Motivation

|                 |       |       |       |      |       |      |       |      |      |      |       |      |       |       |       |      |
|-----------------|-------|-------|-------|------|-------|------|-------|------|------|------|-------|------|-------|-------|-------|------|
| Engagement      | 0.04  | 0.06  | -0.02 | 0.14 | 0.03  | 0.09 | 0.01  | 0.08 | 0.01 | 0.04 | 0.00  | 0.05 | 0.06  | 0.21  | -0.01 | 0.02 |
| Persistence     | 0.03  | 0.04  | -0.01 | 0.20 | 0.01  | 0.07 | 0.00  | 0.05 | 0.00 | 0.04 | 0.00  | 0.06 | 0.04  | 0.16  | -0.01 | 0.01 |
| Procrastination | -0.04 | -0.03 | -0.06 | 0.10 | -0.07 | 0.00 | -0.07 | 0.00 | 0.00 | 0.03 | -0.04 | 0.01 | -0.22 | -0.05 | -0.01 | 0.01 |

## Relatedness → Positive Emotion

|                 |       |       |       |      |       |      |       |       |       |      |       |      |       |       |       |      |
|-----------------|-------|-------|-------|------|-------|------|-------|-------|-------|------|-------|------|-------|-------|-------|------|
| Engagement      | -0.03 | -0.02 | -0.09 | 0.02 | -0.06 | 0.01 | -0.06 | -0.01 | -0.03 | 0.01 | -0.03 | 0.01 | -0.06 | 0.01  | -0.03 | 0.05 |
| Persistence     | -0.04 | -0.03 | -0.11 | 0.01 | -0.08 | 0.01 | -0.06 | -0.01 | -0.03 | 0.01 | -0.04 | 0.00 | -0.08 | -0.01 | 0.00  | 0.10 |
| Procrastination | 0.03  | 0.04  | -0.03 | 0.12 | -0.01 | 0.10 | -0.01 | 0.05  | -0.01 | 0.04 | -0.01 | 0.05 | 0.01  | 0.11  | -0.08 | 0.04 |

## Relatedness → Learning Motivation

|                 |       |       |       |      |       |      |       |       |       |      |       |      |       |       |       |      |
|-----------------|-------|-------|-------|------|-------|------|-------|-------|-------|------|-------|------|-------|-------|-------|------|
| Engagement      | -0.02 | -0.01 | -0.02 | 0.09 | -0.06 | 0.00 | -0.10 | -0.03 | -0.01 | 0.01 | -0.03 | 0.00 | 0.01  | 0.11  | -0.03 | 0.00 |
| Persistence     | -0.02 | -0.01 | -0.04 | 0.11 | -0.05 | 0.00 | -0.06 | -0.01 | -0.01 | 0.01 | -0.04 | 0.00 | 0.01  | 0.08  | -0.02 | 0.01 |
| Procrastination | 0.01  | 0.02  | -0.03 | 0.06 | 0.00  | 0.05 | 0.01  | 0.09  | -0.01 | 0.01 | 0.00  | 0.02 | -0.11 | -0.01 | -0.01 | 0.03 |

---

\*As participants in Poland, due to technical issues, were only presented two items of the competence scale, the model for Poland was not analyzed within the multi-group model but separately.
